# Supplementary material
Source: PubMed Central journal article supplement (PMC3163012)
Supplement: NIHMS268828-supplement-1.pdf [file NIHMS268828-supplement-1.pdf]

Patient: DIS  
Sex: male DOB: Pat-ID: DIS  
Examination: Date: Jun/15/2004 (excluded)  
Scan: Focus: 2.00 dpt Depth: 2.50 mm Operator: cb

OD

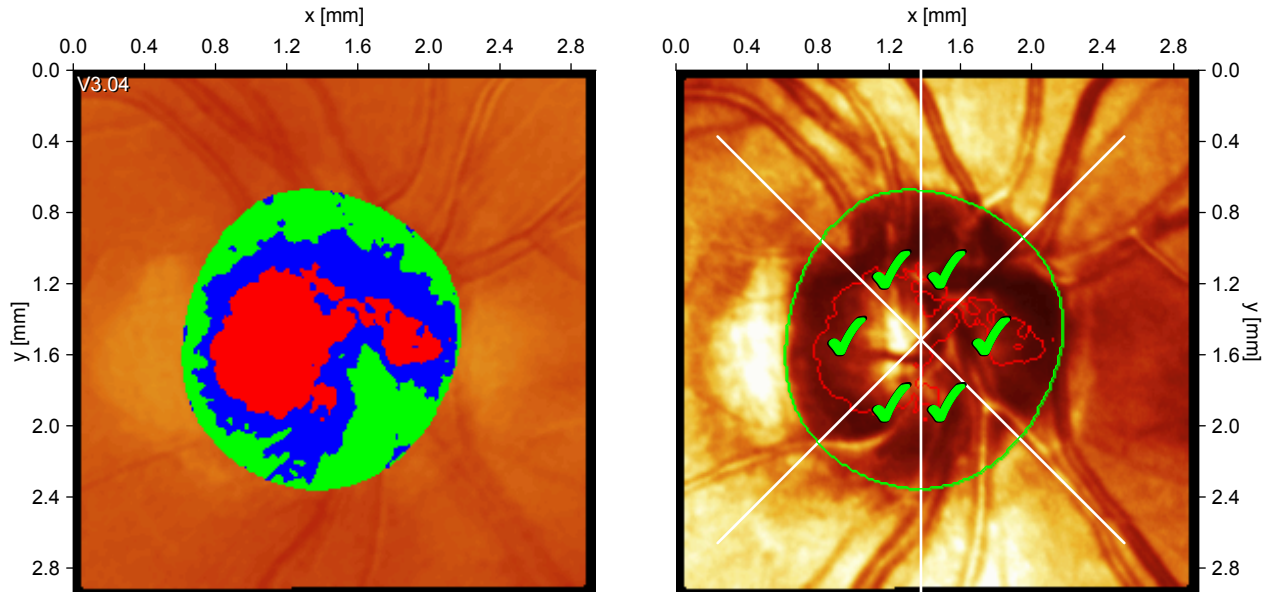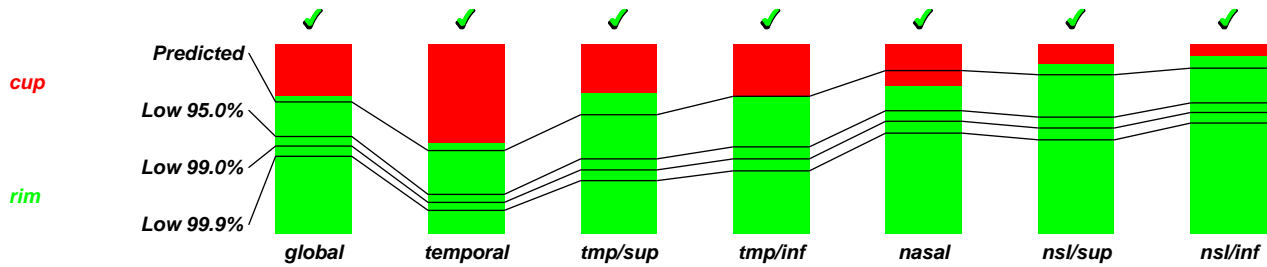

Moorfields regression classification: **within normal limits (\*)**

| Rim area                       | global | temporal | tmp/sup | tmp/inf | nasal | nsl/sup | nsl/inf |
|--------------------------------|--------|----------|---------|---------|-------|---------|---------|
| <b>actual [mm2]</b>            | 1.501  | 0.235    | 0.207   | 0.198   | 0.392 | 0.231   | 0.238   |
| <b>predicted [mm2]</b>         | 1.435  | 0.215    | 0.176   | 0.199   | 0.435 | 0.217   | 0.222   |
| <b>low 95.0% CI lim. [mm2]</b> | 1.060  | 0.102    | 0.111   | 0.126   | 0.328 | 0.159   | 0.175   |
| <b>low 99.0% CI lim. [mm2]</b> | 0.956  | 0.081    | 0.094   | 0.109   | 0.299 | 0.144   | 0.163   |
| <b>low 99.9% CI lim. [mm2]</b> | 0.844  | 0.061    | 0.078   | 0.091   | 0.268 | 0.128   | 0.149   |
| <b>actual/disk area [%]</b>    | 0.0    | 0.0      | 0.0     | 0.0     | 0.0   | 0.0     | 0.0     |
| <b>predicted [%]</b>           | 69.5   | 43.8     | 62.8    | 72.4    | 86.0  | 83.8    | 87.2    |
| <b>low 95.0% CI lim. [%]</b>   | 51.3   | 20.8     | 39.4    | 45.9    | 64.8  | 61.5    | 68.9    |
| <b>low 99.0% CI lim. [%]</b>   | 46.3   | 16.6     | 33.7    | 39.5    | 59.2  | 55.7    | 63.9    |
| <b>low 99.9% CI lim. [%]</b>   | 40.8   | 12.4     | 28.0    | 33.2    | 53.1  | 49.5    | 58.3    |

(\*) Moorfields regression classification (Ophthalmology 1998;105:1557-1563). Classification based on statistics. Diagnosis is physician's responsibility.

Date: Aug/25/2010 Signature:
