# Supplementary material
Source: PubMed Central journal article supplement (PMC3163012)
Supplement: NIHMS268828-supplement-2.pdf [file NIHMS268828-supplement-2.pdf]

Patient: DIS  
Sex: female DOB: Pat-ID:  
Examination: Date: Nov/4/2004 (excluded)  
Scan: Focus: 1.00 dpt Depth: 3.50 mm Operator: TS

OD

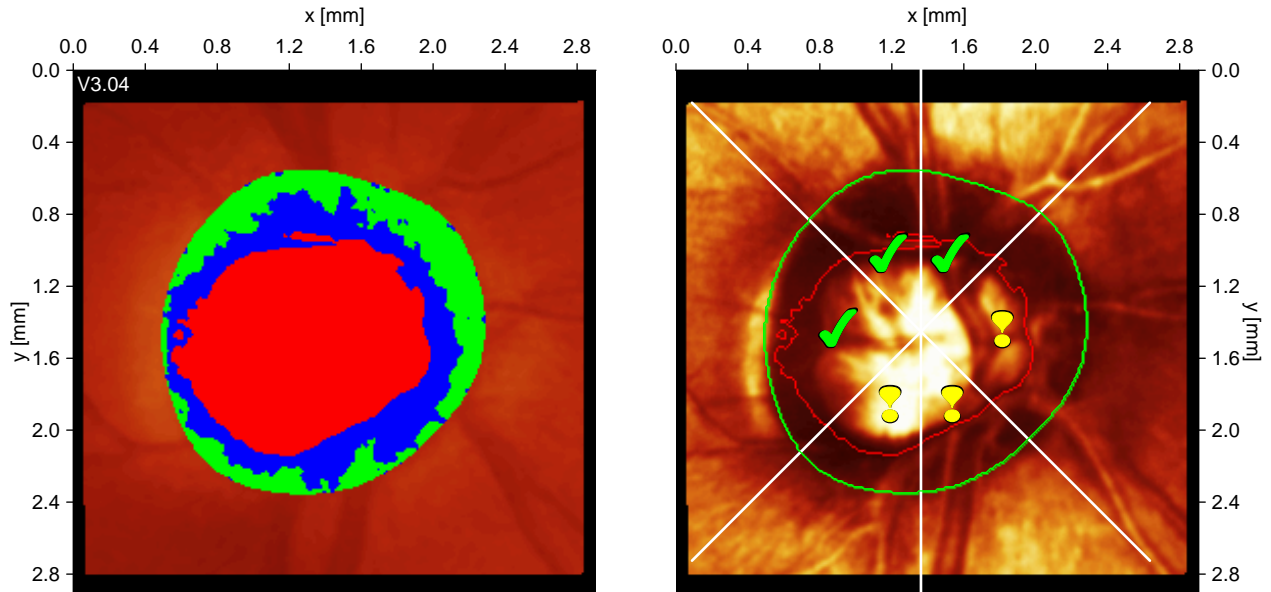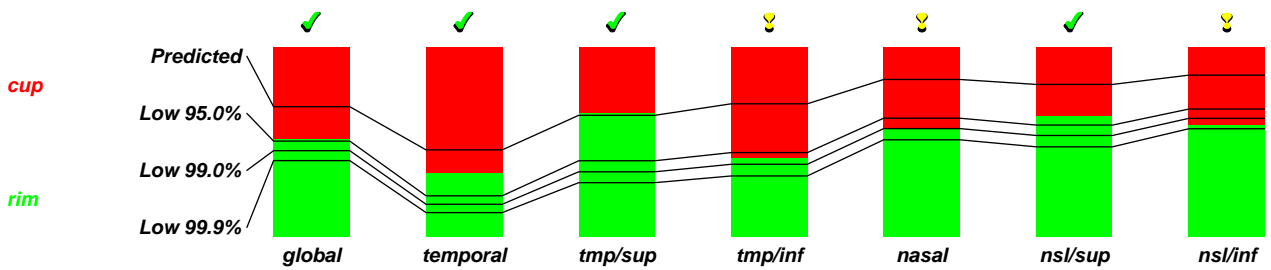

Moorfields regression classification: **borderline (\*)**

| Rim area                       | global | temporal | tmp/sup | tmp/inf | nasal | nsl/sup | nsl/inf |
|--------------------------------|--------|----------|---------|---------|-------|---------|---------|
| <b>actual [mm2]</b>            | 1.309  | 0.212    | 0.212   | 0.142   | 0.378 | 0.196   | 0.169   |
| <b>predicted [mm2]</b>         | 1.750  | 0.289    | 0.208   | 0.241   | 0.547 | 0.248   | 0.245   |
| <b>low 95.0% CI lim. [mm2]</b> | 1.287  | 0.136    | 0.130   | 0.152   | 0.412 | 0.182   | 0.193   |
| <b>low 99.0% CI lim. [mm2]</b> | 1.160  | 0.108    | 0.111   | 0.131   | 0.376 | 0.165   | 0.179   |
| <b>low 99.9% CI lim. [mm2]</b> | 1.025  | 0.080    | 0.093   | 0.110   | 0.337 | 0.146   | 0.164   |
| <b>actual/disk area [%]</b>    | 0.0    | 0.0      | 0.0     | 0.0     | 0.0   | 0.0     | 0.0     |
| <b>predicted [%]</b>           | 68.5   | 45.8     | 64.0    | 70.0    | 82.9  | 80.2    | 85.1    |
| <b>low 95.0% CI lim. [%]</b>   | 50.4   | 21.6     | 40.1    | 44.4    | 62.4  | 58.8    | 67.3    |
| <b>low 99.0% CI lim. [%]</b>   | 45.4   | 17.1     | 34.2    | 38.2    | 57.0  | 53.3    | 62.4    |
| <b>low 99.9% CI lim. [%]</b>   | 40.1   | 12.8     | 28.5    | 32.1    | 51.1  | 47.4    | 56.9    |

(\*) Moorfields regression classification (Ophthalmology 1998;105:1557-1563). Classification based on statistics. Diagnosis is physician's responsibility.

Date: Aug/25/2010 Signature:
